# Supplementary material for: Socio-hydrological spaces in the Jamuna River floodplain in Bangladesh
Source: Copernicus journal article supplement (doi:10.5194/hess-2017-748), 2018-01-03
Supplement: Supplementary file 1 [file hess-2017-748-supplement.zip]

Archive with 2 entries (2 files):
- ESM/ESM1 Questionnaires for household surveys.pdf
- ESM/ESM2 Agenda for Focus Group Discussion.pdf
