# Supplementary material for: Socio-hydrological spaces in the Jamuna River floodplain in Bangladesh
Source: Copernicus journal article supplement (doi:10.5194/hess-2017-748), 2018-01-03
Supplement: Supplementary file 1 [file hess-2017-748-supplement.zip › ESM/ESM1 Questionnaires for household surveys.pdf]

**Title: Socio-Hydrological dynamics in Bangladesh - Understanding the interaction between hydrological and social processes along the Brahmaputra floodplain**

**Questionnaires for household survey**

Date:

Sl. No:

GPS location/ mark in map:

**Section A: General household information**

**1. Name of respondent:**

**2. Age:**

**3. Father's / husband's name:**

**4. Address:**

**5. Contact number (if any):**

**6. Distance of house from river (approximately):**

**7. Main occupation (household main income source):**

7a. Farmer: ☐ Large (land > 7.50 acres) ☐ Medium (land 2.5-7.49 acres) ☐ Small (land 0.5-2.49 acres) ☐ Marginal (land 0.05-0.5 acres) ☐ Share cropper

7b. Fisher: ☐ Fishing in the rivers ☐ Fish culture in ponds ☐ Both

7c. Businessman: (type)-

7d. Service holder: (Institute/organization)-

7e. Daily wage labor: ☐ Agricultural-labor ☐ Other (specify)

7f. Housewife

7g. Other (specify):

**8. Distance of agricultural land from river (approximately):**

**9. Basic information about household**

9a. Household Size:

9b. No. of earning member:

9c. Number of household members absent much of time here:

9d. Assets of the household: Land ownership

| Type of Land | Area (dec) | Value (BDT/dec) |
|--------------|------------|-----------------|
| Agriculture  |            |                 |
| Ponds        |            |                 |
| Homestead    |            |                 |
| Others       |            |                 |

9e. Other assets:

| Assets                                    | Number | Approximate value (BDT) |
|-------------------------------------------|--------|-------------------------|
| Housing materials/ construction type/size |        |                         |
| Livestock                                 |        |                         |
| Others                                    |        |                         |

9f. Average annual income of the household (BDT):

Agriculture:

Fisheries:

Other sources list:

9g. Average monthly expenditure of the household (BDT):

9h. Housing Condition (building material):

**10. How long are you living here? ..... years.****11. Information about origin?** ☐ Born here ☐ Immigrated from another place**12. Reason of immigration** (Only applicable for immigrated people from another place):

12a. From where did you come here?

12 b. What is the reason/s of your immigration?

12c. Before immigration, did you know if this location was exposed to flooding or not? ☐ Yes ☐ No12d. Before immigration, did you know if this location was exposed to riverbank erosion or not? ☐ Yes ☐ No**Section B: Flood experiences of the household****13. Information about flood:**13a. Have you seen floods in your area before? ☐ Yes ☐ No

13b. If yes, please specify:

| Years | Months | Flood depth (feet)<br>in your homestead | Flood depth (feet) in<br>your agriculture land | Flood duration<br>(days) |
|-------|--------|-----------------------------------------|------------------------------------------------|--------------------------|
|       |        |                                         |                                                |                          |
|       |        |                                         |                                                |                          |

13c. From where does the flood come to your home or agricultural land?

☐ Heavy rainfall ☐ From Jamuna river ☐ Other rivers/channels (please specify):

13d. Agriculture cropping pattern vulnerable to flood:

Name of crop/s:

Stage: Seedling / Vegetative/ Flowering/ Ripening

13e. Did you change your agricultural cropping pattern due to flooding? ☐ Yes ☐ No

If yes, then how many times and how?

13f. Did you change your agriculture land use pattern due to flooding? ☐ Yes ☐ No

| Years | Permanently/<br>Temporarily | Land from- to | Changed<br>area (dec) | Reason for changing |
|-------|-----------------------------|---------------|-----------------------|---------------------|
|       |                             |               |                       |                     |
|       |                             |               |                       |                     |

13g. List of household's assets damaged in these flood events (same year as Q13b) and their value:

| Household assets          | Value (BDT) |  |  |  |  |  |
|---------------------------|-------------|--|--|--|--|--|
| Years                     |             |  |  |  |  |  |
| Agriculture crops         |             |  |  |  |  |  |
| Farming tools (e.g. pump) |             |  |  |  |  |  |
| Fisheries                 |             |  |  |  |  |  |
| Livestock                 |             |  |  |  |  |  |

|                        |  |  |  |  |  |  |
|------------------------|--|--|--|--|--|--|
| House and HH materials |  |  |  |  |  |  |
| Others:                |  |  |  |  |  |  |

**14. How did you recover from these damages? What were the strategies?**

**15. In your opinion, what is main cause of these floods?**

- ☐ Excessive monsoon rain for several days    ☐ Increased discharge of the nearby rivers and channels
- ☐ Rapid sedimentation of riverbeds    ☐ Sea level rise    ☐ Others (please specify; if, necessary explain)

**16. What are the effects of these floods you have experienced?**

- [a]** Totally displaced from home    **[b]** Partially (temporarily) displaced from home  
**[c]** Not displaced but the home was submerged under flood water                      **[d]** Lost all field crops  
**[e]** Lost all fisheries **[f]** Loss of daily income  
**[g]** Suffered from diarrhea/stomach flu/ pneumonia/cold/fever/skin disease/snake bite/death  
**[h]** Others (please specify; if, necessary explain)

| Years | Codes | Others (please specify) |
|-------|-------|-------------------------|
|       |       |                         |
|       |       |                         |

### 17. Coping strategies of flooding: For homestead:

- |                                                                           |                                                   |
|---------------------------------------------------------------------------|---------------------------------------------------|
| <b>[a]</b> Raising homestead                                              | <b>[b]</b> Raised platform for human              |
| <b>[c]</b> Raised platform for food, fuel, water                          | <b>[d]</b> Moving to flood shelters/ safer places |
| <b>[e]</b> Raised platform for poultry and livestock                      | <b>[f]</b> Changing eating behavior               |
| <b>[g]</b> Use purifying tablets for drinking water                       | <b>[h]</b> Portable stove for cooking             |
| <b>[i]</b> Transferable construction materials of house                   |                                                   |
| <b>[j]</b> Plantation/ iron sheet/ bamboo around house to prevent erosion |                                                   |
| <b>[k]</b> Others (please specify):                                       |                                                   |

| Years | Codes | Others (please specify) |
|-------|-------|-------------------------|
|       |       |                         |
|       |       |                         |

**For agriculture, aquaculture and other economic activities and income generation:**

- [a]** Flood resistant crops (crops: \_\_\_\_\_)
- [b]** Planting a short duration crop after floods
- [c]** Keep fallow during flood season      **[d]** Grow vegetable in raised land/ platform
- [e]** Protect fish pond with net      **[f]** Alternative source of income during flood
- [g]** Selling women jewelry      **[h]** Borrowing from others
- [i]** Mortgaging and selling land and other productive assets.
- [j]** Others (please specify): \_\_\_\_\_

| Years | Codes | Others (please specify) |
|-------|-------|-------------------------|
|       |       |                         |
|       |       |                         |

**18. Did you change your occupation due to flood?** ☐ Yes ☐ No

| Years | Permanently/ Temporarily | Previous occupation | Changed occupation |
|-------|--------------------------|---------------------|--------------------|
|       |                          |                     |                    |
|       |                          |                     |                    |

**19. Has your income level decreased due to flood?** ☐ Yes ☐ No

If yes then, ☐ Permanently ☐ Temporarily

Mention monthly amount and year?

**20. Has your cost of living increased due to flood?** ☐ Yes ☐ No

If yes then, ☐ Permanently ☐ Temporarily

Mention monthly amount and year?

**21. Is there scarcity of job opportunity due to flood?** ☐ Yes ☐ No

If yes, mention how does this arise?

**22. Is there any new job opportunity due to flood?** ☐ Yes ☐ No

If yes, mention how does this arise?

**23. What is your perception about controlling flood with structure like embankment or others?**

☐ Good for society, it saves lives and damages

☐ Not good for society. (Why? Explain: )

☐ Others (please specify)

**24. The presence of an irrigation project (with its bunds etc) would affect the pattern of flooding?**

☐ Yes ☐ No

Please clarify:

**25. Are you thinking of migration to another place for better opportunity?** ☐ Yes ☐ No

If yes, mention why and where?

☐ Temporary migration for few months (explain: )

☐ Permanent migration with family (explain: )

**26. Do you know anyone (neighbor, family friends) who had migrated from this area?** ☐ Yes ☐ No

If yes, mention why, which year and where?

☐ Temporary migration for few months (explain: )

☐ Permanent migration with family (explain: )

Please specify if there are multiple possibilities:

**27. Did you receive any early warning message about the flooding?** ☐ Yes ☐ No

| Years | how many days before of the event | from whom | how/medium |
|-------|-----------------------------------|-----------|------------|
|       |                                   |           |            |
|       |                                   |           |            |

**28. What measures were taken by the government against flooding?**

**29. Did you do any special flood response activity for the society? If yes, list them below.**

**Section C: River bank erosion experiences of the household****30. Information about river bank erosion: (if char erosion then mention)**

30a. Have you ever experienced with river bank erosion? ☐ Yes ☐ No

30b. Did you migrate due to river bank erosion? If yes, when and how many times in your life?

| Years | Old place | New place | Distance (km) | Reasons |
|-------|-----------|-----------|---------------|---------|
|       |           |           |               |         |
|       |           |           |               |         |

30c. Have you lost your lands due to river bank erosion? ☐ Yes ☐ No

| Years (with occurring month) | Type of lands | Area (ha) | Value (BDT) |
|------------------------------|---------------|-----------|-------------|
|                              |               |           |             |
|                              |               |           |             |

If no, then do you think that you will lose your lands in future? ☐ Yes ☐ No

30d. Have you lost your homestead and move home due to river bank erosion? ☐ Yes ☐ No

| Years (with occurring month) | Area (ha) | Value (BDT) | Homestead assets lost | Value (BDT) |
|------------------------------|-----------|-------------|-----------------------|-------------|
|                              |           |             |                       |             |
|                              |           |             |                       |             |

If no, then do you think that you will be forced to move home in future? ☐ Yes ☐ No

30e. Did you change your agricultural cropping pattern due to river bank erosion? ☐ Yes ☐ No

If yes, then how?

**31. How did you recover from these damages listed in Q309c, Q30d?****32. In your opinion, what is main cause of river bank erosion?**

33. Did you receive any assistance during riverbank erosion? ☐ Yes ☐ No

If yes, from whom and how?

34. In your opinion and experience, has the Jamuna embankment helped to protect people from river bank erosion?

**35. Coping with riverbank erosion:**

**For homestead:**

**For agriculture, fishing and other economic activities and income generation:**

36. Did you change your occupation due to riverbank erosion? ☐ Yes ☐ No

If yes then, ☐ Permanently ☐ Temporarily

Mention the previous occupation(s) and year of change(s)?

37. Has your income level changes due to riverbank erosion? ☐ Yes ☐ No

If yes then, ☐ Fell ☐ Same ☐ Rose and ☐ Permanently ☐ Temporarily

Mention monthly amount and year?

38. Has your cost of living changed due to riverbank erosion? ☐ Yes ☐ No

If yes then, ☐ Fell ☐ Same ☐ Rose and ☐ Permanently ☐ Temporarily

Mention monthly amount and year?

**39. Did you receive any early warning message about the riverbank erosion?** ☐ Yes ☐ No

| Years | how many days before of the event | from whom | how/medium |
|-------|-----------------------------------|-----------|------------|
|       |                                   |           |            |
|       |                                   |           |            |

**40. What measures taken by the government against riverbank erosion?**

**41. Do you have any additional comments?**
