# Supplementary material for: Socio-hydrological spaces in the Jamuna River floodplain in Bangladesh
Source: Copernicus journal article supplement (doi:10.5194/hess-2017-748), 2018-01-03
Supplement: Supplementary file 1 [file hess-2017-748-supplement.zip › ESM/ESM2 Agenda for Focus Group Discussion.pdf]

**Title: Socio-Hydrological dynamics in Bangladesh - Understanding the interaction between hydrological and social processes along the Brahmaputra floodplain**

**Agenda for Focus Group Discussion with livelihood groups**

1. Introduction: discuss about the research
2. How flood is affecting the livelihood group and what are the coping strategies?
3. What are the main reasons of flooding in your area?
4. Is the livelihood group has the tendency or bound to change their occupation due to flooding?
5. Is the livelihood group has the tendency or bound to migrate due to flooding?
6. Did your neighbors migrate due to flooding?
7. Do you think any human activity has influence on flooding or increase of flooding?
8. Do you receive any flood forecast form any where?
9. What strategies government taken against flooding?
10. How riverbank erosion is affecting the livelihood group and what are the coping strategies?
11. Is the livelihood group has the tendency or bound to change their occupation due to riverbank erosion?
12. Is the livelihood group has any tendency to migrate to another places due to riverbank erosion?
13. Do you receive any forecast regarding river bank erosion?
14. Do you think any human activity has influence on riverbank erosion?
15. What are the initiatives from the government or local administration to mitigate the impacts?
